# Supplementary material for: Hermetia illucens and Poultry by-Product Meals as Alternatives to Plant Protein Sources in Gilthead Seabream (Sparus aurata) Diet: A Multidisciplinary Study on Fish Gut Status
Source: PubMed Central journal article supplement (PMC8001786; doi:10.3390/ani11030677), 2021-03-04
Supplement: animals-11-00677-s001.pdf [file animals-11-00677-s001.pdf]

# Supplementary Materials: *Hermetia illucens* and Poultry by-Product Meals as Alternatives to Plant Protein Sources in Gilt-head Seabream (*Sparus aurata*) Diet. A multidisciplinary Study on Fish Gut Status

Basilio Randazzo, Matteo Zarantoniello, Gloriana Cardinaletti, Roberto Cerri, Elisabetta Giorgini, Alessia Belloni, Michela Contò, Emilio Tibaldi and Ike Olivotto

**Table S1.** Proximate analysis (% as fed) and fatty acid profile (% FAMES) of commercial insect meal (HM) and poultry by-product meal (PBM) used as test ingredients in the experiment.

| Proximate Composition | HM    | PBM   |
|-----------------------|-------|-------|
| Moisture              | 4.42  | 5.80  |
| N × 6.25              | 53.10 | 65.56 |
| Ash                   | 6.37  | 12.41 |
| Chitin <sup>#</sup>   | 4.69  | -     |
| Crude lipid           | 20.80 | 14.83 |
| <b>Fatty acids</b>    |       |       |
| SFA                   | 61.08 | 30.70 |
| C12                   | 31.82 | 0.06  |
| C14                   | 7.09  | 0.93  |
| C18                   | 3.30  | 7.73  |
| MUFA                  | 18.8  | 48.7  |
| C16:1                 | 2.3   | 5.6   |
| C18:1c                | 13.5  | 38.8  |
| PUFA                  | 20.2  | 20.6  |
| PUFA n6               | 19.1  | 19.6  |
| C18:2n6               | 18.8  | 17.3  |
| C20:4n6               | 0.2   | 1.4   |
| PUFA n3               | 1.0   | 1.0   |
| C18:3n3               | 0.9   | 0.1   |
| C20:5n3 EPA           | -     | 0.1   |
| C22:6n3DHA            | 0.1   | 0.1   |
| n6/n3                 | 18.9  | 19.2  |
